# Supplementary material
Source: ML conference proceedings conference paper supplement (https://openaccess.thecvf.com/content/CVPR2022/html/Lee_Interactive_Multi-Class_Tiny-Object_CVPR_2022_paper.html)
Supplement: Supplementary file 3 [file Lee_Interactive_Multi-Class_Tiny-Object_CVPR_2022_supplemental.zip]

Archive with 4 entries (4 files):
- 2489-supp.pdf
- __MACOSX/._2489-supp.pdf
- 2489-supp.mp4
- __MACOSX/._2489-supp.mp4
